# Supplementary material
Source: publisher figshare collection journal article supplement (https://acs.figshare.com/ndownloader/files/9698290)
Supplement: Supplementary file 1 [file 9698290]

## Supporting Information

# **Distorted Carbon Nitride Structure with Substituted Benzene Moieties for Enhanced Visible Light Photocatalytic Activities**

Hyejin Kim<sup>1</sup>, Suji Gim<sup>2</sup>, Tae Hwa Jeon<sup>1</sup>, Hyungjun Kim<sup>2</sup>, and Wonyong Choi<sup>1\*</sup>

*<sup>1</sup>Division of Environmental Science and Engineering, Pohang University of Science and Technology (POSTECH), Pohang 37673, Korea*

*<sup>2</sup>Graduate School of Energy, Environment, Water, and Sustainability (EEWS), Korea Advanced Institute of Science and Technology, 291 Daehak-Ro, Yuseong-Gu, Daejeon 305-701, Republic of Korea*

*\*corresponding author*

*Email: [wchoi@postech.edu](mailto:wchoi@postech.edu)*

**Include: Figures S1-S8, Table S1**

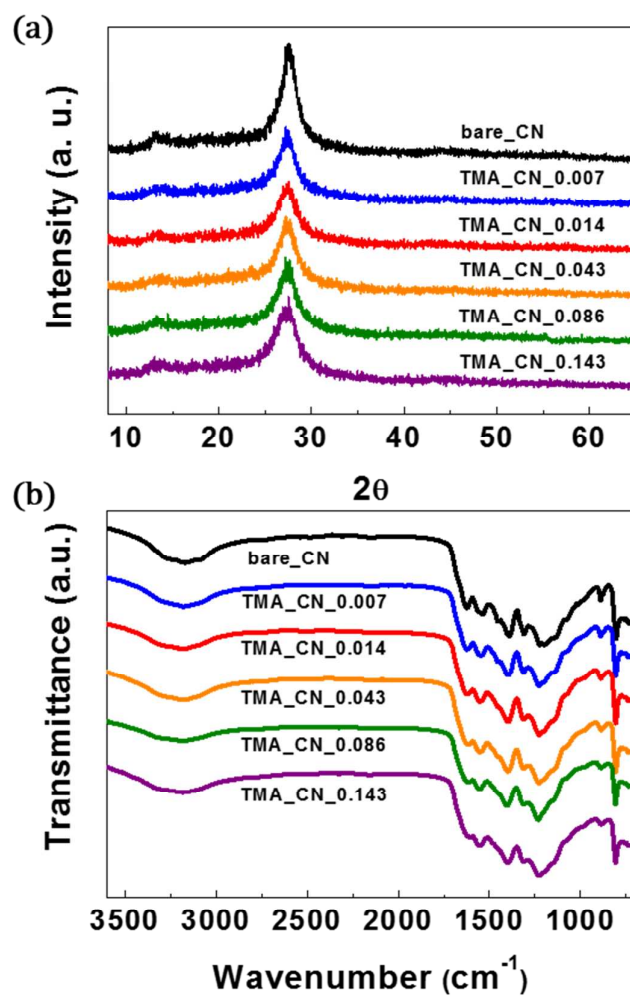

**Figure S1.** (a) XRD spectra and (b) ATR FT-IR spectra of bare\_CN and TMA\_CN varying content of TMA

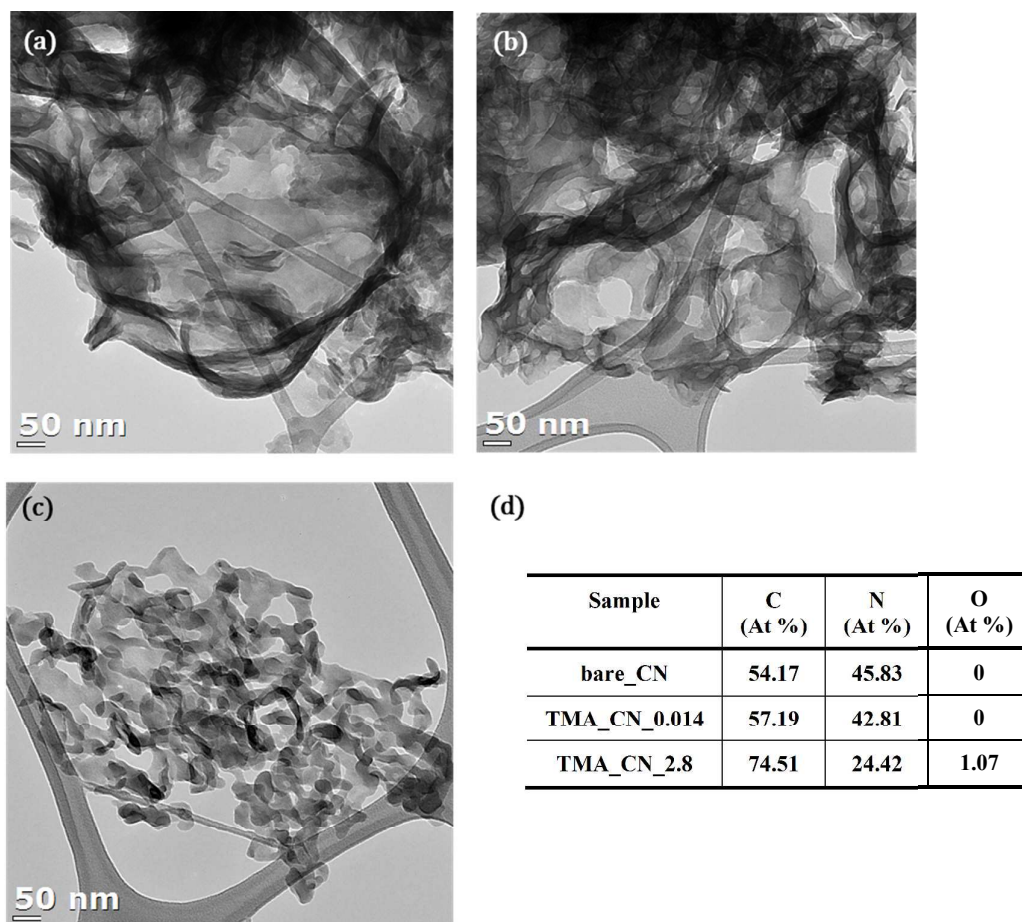

**Figure S2.** TEM images of (a) bare\_CN, (b) TMA\_CN\_0.014 and (c) TMA\_CN\_2.8 (d) elemental compositions obtained from EDS analysis

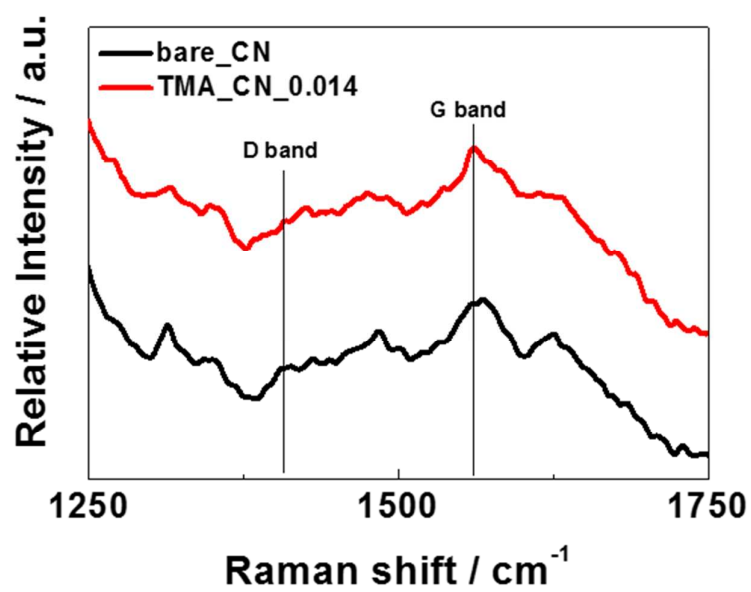

**Figure S3.** Raman spectra of bare\_CN and TMA\_CN\_0.014

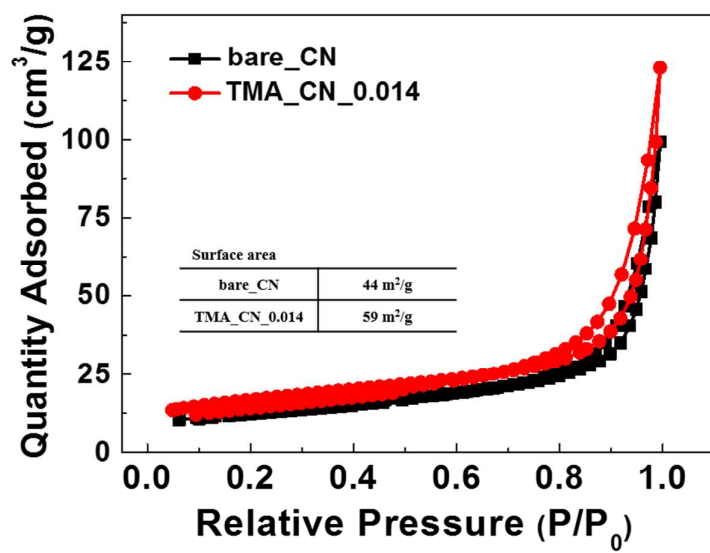

**Figure S4.** The BET surface area analysis of bare\_CN and TMA\_CN\_0.014 by  $\text{N}_2$ -sorption-desorption isotherms

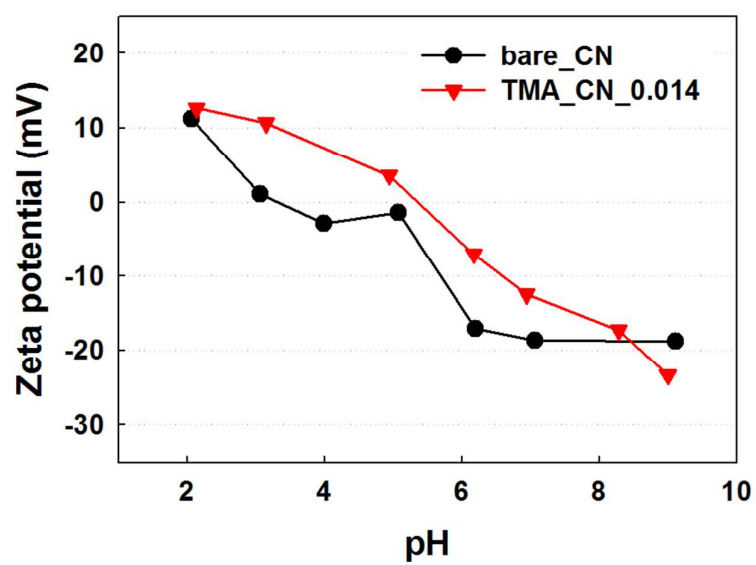

**Figure S5.** Zeta-Potential as a function of pH for bare\_CN and TMA\_CN\_0.014

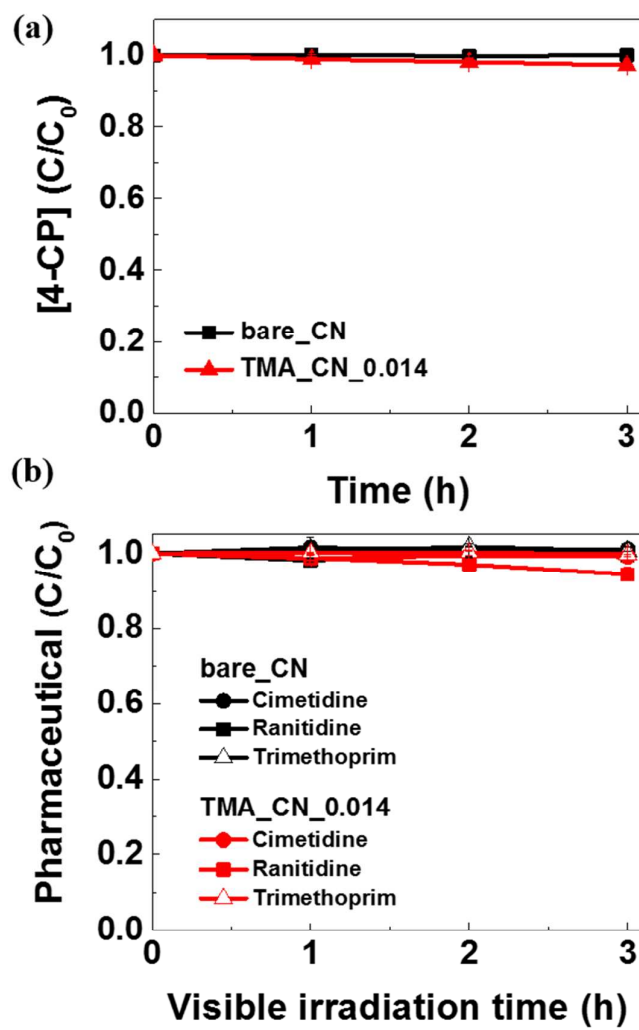

**Figure S6.** The dark control experiments using bare\_CN and TMA\_CN\_0.014 for the removal of (a) 4-CP and (b) pharmaceutical compounds

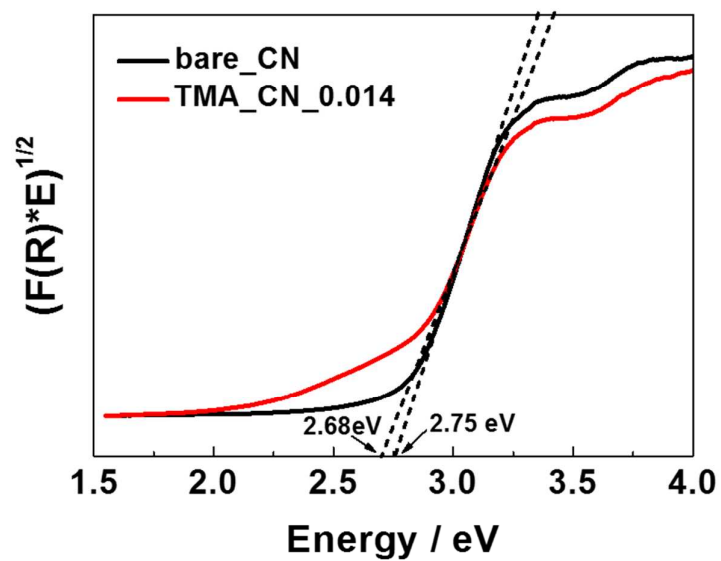

**Figure S7.** Tauc plots for bare\_CN and TMA\_CN\_0.014



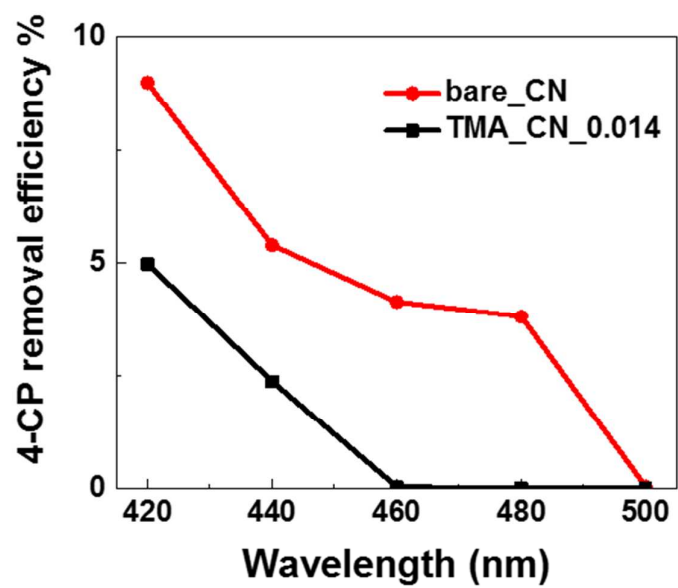

**Figure S8.** Photocatalytic removal efficiency of 4-CP with bare\_CN and TMA\_CN\_0.014 as a function of monochromatic irradiation wavelength.

|                     | <b>C (wt %)</b> | <b>N (wt %)</b> | <b>H<br/>(wt %)</b> | <b>O (wt %)</b> | <b>C/N</b>   |
|---------------------|-----------------|-----------------|---------------------|-----------------|--------------|
| <b>bare_CN</b>      | <b>33.70</b>    | <b>60.55</b>    | <b>1.90</b>         | <b>1.23</b>     | <b>0.556</b> |
| <b>TMA_CN_0.007</b> | <b>33.59</b>    | <b>60.20</b>    | <b>1.68</b>         | <b>2.08</b>     | <b>0.558</b> |
| <b>TMA_CN_0.014</b> | <b>33.50</b>    | <b>59.65</b>    | <b>1.71</b>         | <b>2.84</b>     | <b>0.562</b> |
| <b>TMA_CN_0.043</b> | <b>33.44</b>    | <b>57.98</b>    | <b>1.84</b>         | <b>3.83</b>     | <b>0.577</b> |
| <b>TMA_CN_0.086</b> | <b>34.10</b>    | <b>57.84</b>    | <b>1.78</b>         | <b>3.84</b>     | <b>0.589</b> |
| <b>TMA_CN_0.143</b> | <b>35.00</b>    | <b>56.47</b>    | <b>1.80</b>         | <b>4.16</b>     | <b>0.620</b> |

**Table S1.** Elemental analysis of bare\_CN and TMA\_CN\_x.
